# Supplementary material for: Paternal uniparental disomy 14 and related disorders: Placental gene expression analyses and histological examinations
Source: PubMed Central journal article supplement — Epigenetics. 2012 Oct 1;7(10):1142–50. doi: 10.4161/epi.21937 (PMC3469456; doi:10.4161/epi.21937), 2012-10-01
Supplement: epi-7-1142-s01.pdf [file epi-7-1142-s01.pdf]

Supplemental Material to:

Kagami M, Matsuoka K, Nagai T, Yamanaka M, Kurosawa K, Suzumori N, et al.  
Paternal uniparental disomy 14 and related disorders: Placental gene expression analyses  
and histological examinations. *Epigenetics* 2012; 7(10);

<http://dx.doi.org/10.4161/epi.21937>

<http://www.landesbioscience.com/journals/epigenetics/article/21937>

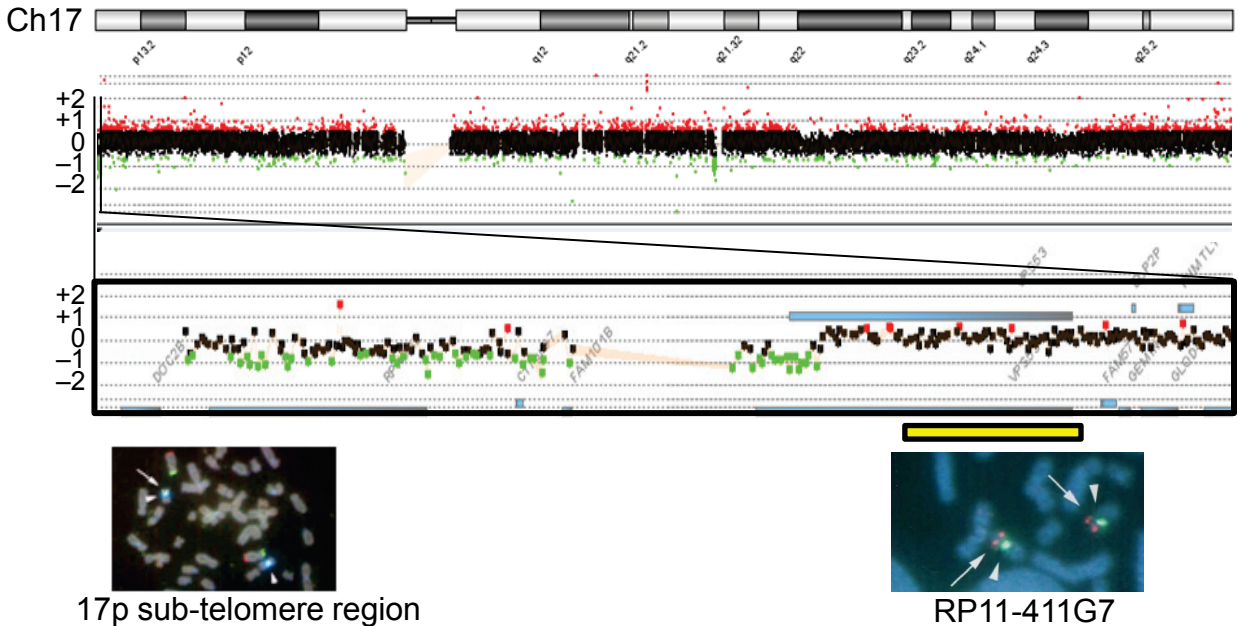

**Supplemental Figure 1.** Array CGH and FISH analysis for the terminal 17p portion in case 4. In CGH analysis, the black, the red, and the green dots denote signals indicative of the normal, the increased ( $> +0.5$ ), and the decreased ( $< -1.0$ ) copy numbers, respectively. In FISH analysis, the 17p sub-telomeric probe detects only a single faint yellow signal (an arrow), whereas the RP11-411G7 probe identifies two red signals (arrows). The CEP17 probe for 17p11.1 is used as an internal control (arrowheads). The extra green and the red signals on the left panel are derived from the 8p probe and 8q probe, respectively.

Supplemental Table 1. Summary of clinical features

|                                       | Case 1           | Case 2           | Case 3             | Case 4                            |
|---------------------------------------|------------------|------------------|--------------------|-----------------------------------|
| Sex                                   | Female           | Male             | Male               | Female                            |
| Karyotype                             | 46,XX,upd(14)pat | 46,XY,upd(14)pat | 46,XY <sup>c</sup> | 46,XX,der(17)t(14;17)(q31;p13)pat |
| Gestational age (wks)                 | 36               | 37               | 30                 | 40                                |
| Birth length (cm) (SD) <sup>a</sup>   | 45.0 (−0.8)      | 48.0 (±0)        | N.E.               | 50.5 (+0.9)                       |
| Birth weight (kg) (SD) <sup>a</sup>   | 3.4 (+2.5)       | 2.7 (−0.4)       | 2.0 <sup>d</sup>   | 3.3 (+0.6)                        |
| Upd(14)pat phenotype                  | Typical          | Typical          | Typical            | Apparently absent                 |
| Polyhydramnios                        | +                | +                | +                  | −                                 |
| Placental weight (g) (%) <sup>b</sup> | 970 (198)        | 1384 (262)       | 642 (163)          | 550 (104)                         |
| Characteristic face                   | +                | +                | +                  | −                                 |
| Bell-shaped thorax                    | +                | +                | +                  | −                                 |
| Abdominal wall defect                 | +                | +                | +                  | + (omphalocele)                   |
| Non-upd(14)pat phenotype              | −                | −                | −                  | + <sup>e</sup>                    |
| References                            | 1, 2             | 2, 3             | 4                  | This report                       |

<sup>a</sup> Assessed by the gestational age- and sex-matched Japanese reference data from the Ministry of Health, Labor, and Welfare (<http://www.e-stat.go.jp/SG1/estat/eStatTopPortal.do>).

<sup>b</sup> Assessed by the gestational age-matched Japanese reference data for placental weights.<sup>5,6</sup>

<sup>c</sup> Positive for a 108,768 bp microdeletion involving *DLK1*, the IG-DMR, the *MEG3*-DMR, and *MEG3* of maternal origin.

<sup>d</sup> No gestational age-matched growth reference for neonates born at 30 weeks of gestational age.

<sup>e</sup> Non-specific facial features and cardiomegaly and hepatomegaly of unknown cause.

#### References

1. Yamanaka M, Ishikawa H, Saito K, Maruyama Y, Ozawa K, Shibasaki J, et al. Prenatal findings of paternal uniparental disomy 14: report of four patients. *Am J Med Genet A* 2010;152A:789-91.
2. Kagami M, Kato F, Matsubara K, Sato T, Nishimura G, Ogata T. Relative frequency of underlying genetic causes for the development of UPD(14)pat-like phenotype. *Eur J Hum Genet* 2012;20:928-32.
3. Suzumori N, Ogata T, Mizutani E, Hattori Y, Matsubara K, Kagami M, et al. Prenatal findings of paternal uniparental disomy 14: Delineation of further patient. *Am J Med Genet A* 2010;152A:3189-92.
4. Kagami M, Sekita Y, Nishimura G, Irie M, Kato F, Okada M, et al. Deletions and epimutations affecting the human 14q32.2 imprinted region in individuals with paternal and maternal upd(14)-like phenotypes. *Nat Genet* 2008;40:237-42.
5. Kagami M, Yamazawa K, Matsubara K, Matsuo N, Ogata T. Placentomegaly in paternal uniparental disomy for human chromosome 14. *Placenta* 2008;29:760-1.
6. Nakayama, M. Placental pathology. Tokyo, Igaku Shoin, 2002:106-7 (in Japanese).

Supplemental Table 2. The results of microsatellite analysis

| Maker           | Locus    | Case 1  |         |         |              | Case 2  |         |         |            | Case 4  |         |         |            |
|-----------------|----------|---------|---------|---------|--------------|---------|---------|---------|------------|---------|---------|---------|------------|
|                 |          | Mother  | Proband | Father  | Assessment   | Mother  | Proband | Father  | Assessment | Mother  | Proband | Father  | Assessment |
| <i>D14S609</i>  | 14q11.2  | 170     | 162/166 | 162/166 | Heterodisomy | 170/174 | 170     | 170     | N.I.       |         |         |         |            |
| <i>D14S261</i>  | 14q11.2  | 189/191 | 189     | 189     | N.I.         | 165     | 165     | 165/189 | N.I.       | ...     | ...     | ...     | ...        |
| <i>D14S80</i>   | 14q12    | 97/105  | 103     | 97/103  | Isodisomy    | 97      | 97      | 97      | N.I.       | ...     | ...     | ...     | ...        |
| <i>D14S608</i>  | 14q12    | 212/222 | 208     | 208/212 | Isodisomy    | 200     | 194     | 194/210 | Isodisomy  | ...     | ...     | ...     | ...        |
| <i>D14S75</i>   | 14q13.3  | 190/196 | 190     | 190     | N.I.         | 182/196 | 180     | 180/190 | Isodisomy  | ...     | ...     | ...     | ...        |
| <i>D14S566</i>  | 14q21.2  | 122/132 | 144     | 132/144 | Isodisomy    | 128/132 | 128     | 128/132 | N.I.       | ...     | ...     | ...     | ...        |
| <i>D14S136</i>  | 14q22.1  | 151     | 151     | 151     | N.I.         | 151     | 151     | 151     | N.I.       | ...     | ...     | ...     | ...        |
| <i>D14S1152</i> | 14q21.3  | 203     | 203     | 203     | N.I.         | 203     | 203     | 203     | N.I.       | ...     | ...     | ...     | ...        |
| <i>D14S980</i>  | 14q22.3  | 153/167 | 167     | 157/167 | N.I.         | 167/173 | 165     | 161/165 | Isodisomy  | ...     | ...     | ...     | ...        |
| <i>D14S63</i>   | 14q23.2  | 203/209 | 207     | 207     | Isodisomy    | 203/207 | 203     | 203     | N.I.       | ...     | ...     | ...     | ...        |
| <i>D14S588</i>  | 14q24.2  | 114/122 | 114     | 110/114 | N.I.         | 114/126 | 114     | 114/122 | N.I.       | ...     | ...     | ...     | ...        |
| <i>D14S1025</i> | 14q24.3  | 142/144 | 144     | 144/146 | N.I.         | 140/142 | 148     | 144/148 | Isodisomy  | ...     | ...     | ...     | ...        |
| <i>D14S617</i>  | 14q32.12 | 164     | 138     | 134/138 | Isodisomy    | 139/169 | 143     | 143/165 | Isodisomy  | ...     | ...     | ...     | ...        |
| <i>D14S250</i>  | 14q32.2  | 162/164 | 160     | 160/164 | Isodisomy    | 158     | 158     | 158/166 | N.I.       | 154/158 | 158/162 | 160/162 | Biparental |
| <i>D14S1006</i> | 14q32.2  | 126/144 | 126     | 126/140 | N.I.         | 126/138 | 126     | 126/138 | N.I.       | 126/136 | 126     | 126/144 | N.I.       |
| <i>D14S985</i>  | 14q32.2  | 136     | 136     | 136     | N.I.         | 136/138 | 132     | 132/134 | Isodisomy  | ...     | ...     | ...     | ...        |
| <i>D14S1010</i> | 14q32.33 | 138/146 | 146     | 142/146 | N.I.         | 134/142 | 142     | 142/144 | N.I.       | ...     | ...     | ...     | ...        |
| <i>D14S292</i>  | 14q32.33 | 111/123 | 123     | 111/123 | N.I.         | 105/111 | 109     | 107/109 | Isodisomy  | ...     | ...     | ...     | ...        |
| <i>D14S1007</i> | 14q32.33 | 113     | 123     | 113/123 | Isodisomy    | 119     | 119     | 119     | N.I.       | 111/119 | 119/123 | 111/123 | Biparental |

Abbreviations, N.I.: not informative

Supplemental Table 3. Primers utilized in the present study

|                                               | Forward primer                                              | Reverse primer                 | AT |
|-----------------------------------------------|-------------------------------------------------------------|--------------------------------|----|
| <Microsatellite analysis>                     |                                                             |                                |    |
| <i>D14S609</i>                                | AGCTCTAACAGTTTTGTCATGG                                      | TATGTGCCCTAAAGGAAGCA           | 57 |
| <i>D14S261</i>                                | GGCAGTATGACCCAGTTACAGAT                                     | ATTTTGAAGCCCCAGGAA             | 57 |
| <i>D14S80</i>                                 | CTTTCCTTGTTTTATAAGGCTG                                      | CAACTTAGTGTTTCATTGATGCA        | 55 |
| <i>D14S608</i>                                | TAAAGGTTTATCCATGCTGTAGC                                     | ACGTGGTACAGGTAGATAAATGG        | 55 |
| <i>D14S75</i>                                 | TGTCCCCAGGTGTTGA                                            | CCAAGTGGCCTTGCTC               | 57 |
| <i>D14S566</i>                                | GCCACTGCACTTCTGCCTGG                                        | CCAAGATACATTCCTGATTGAG         | 57 |
| <i>D14S136</i>                                | TCAGAGTCGATCAAAATATGT                                       | GATGTGAGTTTGAAAAGCAG           | 57 |
| <i>D14S1152</i>                               | GATGTGCCAAGCACTGTTGTA                                       | TCATACACTTCCATAGCAGCG          | 57 |
| <i>D14S980</i>                                | CTGGGCAACAAGAGTGG                                           | GAAGCGGGACAATTCTCTAAG          | 57 |
| <i>D14S63</i>                                 | GGCCAGGTTTCAATCAGTTT                                        | GCCAGAGAGCCACACTGTAT           | 57 |
| <i>D14S588</i>                                | GCCGAAAGAAAGAAAAAAGG                                        | CGAATGCATACTTGCTGTTG           | 55 |
| <i>D14S1025</i>                               | GATGGCACCCTGCAC                                             | AGGAAATTAACATTTTCTTACAGC       | 57 |
| <i>D14S617</i>                                | TTTTAGGTGGCCACCATCTA                                        | CCAGTTTAGGCAACAGAACA           | 55 |
| <i>D14S250</i>                                | GAAACTGGAACCACTGTGC                                         | ACCCCTGCATTGTTTGAG             | 55 |
| <i>D14S1006</i>                               | TTCCACAGGGCAAGCAGTA                                         | TTCTGGCAAAACCCAACC             | 57 |
| <i>D14S985</i>                                | CAGTGTGACCTTAAACAAGTCG                                      | CCTGTGGGGTAGATACACGA           | 57 |
| <i>D14S1010</i>                               | AGATTCTGGACTTGCCAAC                                         | GTAGTAGTCAGGGCTTCCTAGAG        | 55 |
| <i>D14S292</i>                                | CTGTGTGGTGCATCAATG                                          | CATGAAGGCAGCCTCA               | 55 |
| <i>D14S1007</i>                               | AGCTCCTATATGTCTTCACACAG                                     | CTCCATTCCCATACGTCC             | 55 |
| <Methylation analysis>                        |                                                             |                                |    |
| CG4                                           | TTTTATTATTGAATTGGGTTTGTTAGT                                 | ACAATTCCTACTACAAAATTTCAACA     | 57 |
| CG6                                           | GTAAAGAGTTTGTGGATTTGTGAGAAATG                               | CTAAAAATCACCAAACCCATAAAATCAC   | 57 |
| CG7                                           | TTGTGTTTGAATTTATTTTGT                                       | CCCCAAATTCATAACAAATTA          | 57 |
| <Quantitative real-time PCR for <i>RTL1</i> > |                                                             |                                |    |
| 3'RACE primer for synthesizing cDNA           | CTGATCTAGAGGTACCGGATCCGACTCGAGTCGACATCGTTTTTTTTTTTTTTTTTTT. |                                |    |
| q-PCR <i>RTL1</i>                             | TGCCACTTACCAGACTTGCACAGCAAAGAG                              | AGAGGTACCGGATCCGACTCGAGTCGACAT | 70 |
